# Supplementary material for: Exercise prescription variables predict reductions in pain intensity in adults with chronic low back pain: secondary analysis of a randomised controlled trial
Source: PubMed Central journal article supplement — BMJ Open Sport Exerc Med. 2024 Jan 5;10(1):e001744. doi: 10.1136/bmjsem-2023-001744 (PMC10773405; doi:10.1136/bmjsem-2023-001744), 2024-01-05
Supplement: bmjsem-2023-001744supp001.pdf [file bmjsem-2023-001744supp001.pdf]

## SUPPLEMENT

Supplementary Table 1. Resistance training exercises

| Exercise grouping    | Progression 1                             | Progression 2                             | Progression 3                                  | Progression 4                             | Progression 5                                   | Progression 6               |
|----------------------|-------------------------------------------|-------------------------------------------|------------------------------------------------|-------------------------------------------|-------------------------------------------------|-----------------------------|
| <b>Lift</b>          | Sit to stand                              | Touch downs                               | Body weight squats                             | Overhead squats (no weight)               | Dumbbell squats                                 | Overhead squats with weight |
| <b>Extension 1</b>   | Prone floor opposite arm and leg lifts    | Prone trunk extension on floor            | Prone opposite arm and leg lifts on Swiss ball | Prone trunk extension on Swiss ball       | Trunk extension with rotation on floor in prone |                             |
| <b>Extension 2</b>   | Supine double leg bridge                  | Supine single leg bridge                  | Supine double leg bridge on Swiss ball         | Supine Swiss ball hamstring curls         |                                                 |                             |
| <b>Extension 3</b>   | Standing lat pull down                    | Standing straight arm pull down           | Stiff-leg deadlifts                            | Single-leg deadlift                       |                                                 |                             |
| <b>Trunk flexion</b> | Partial curl up in supine fingers to knee | Partial curl up in supine wrist to knee   | Bosu ball crunches                             |                                           |                                                 |                             |
| <b>Push</b>          | Split stance double arm cable chest press | Split stance single arm cable chest press | Single leg double arm chest press              | Single arm opposite leg cable chest press |                                                 |                             |
| <b>Pull</b>          | Split stance double arm cable row         | Split stance opposite arm cable row       | Single leg double arm cable row                | Single leg opposite arm cable row         |                                                 |                             |
